# Supplementary material for: Identifying Health Equity Factors That Influence the Public’s Perception of COVID-19 Health Information and Recommendations: A Scoping Review
Source: MDPI journal article supplement (doi:10.3390/ijerph191912073), 2022-09-23
Supplement: s1 [file s1]

## Appendices

### Search Strategy

#### Ovid MEDLINE

Rybg# HG0IQH-U #D00#4<79#r#Mxd#59/#5354A#

4# khdok#dhudf|2# 9<:6#

5# khdok#dgr#dhudh-#r#dhudf-,,w/de/hi# 43<59#

6# +frqvxp hu#r#sxedf#r#sdwhqw-#dgr#hydxdw-#r#vvhv-#r#ssulv-#r#xgjh-#r#xgjbj#  
r#krrvh-#r#krrvh-#r#krrvlbj-#r#krlf-#r#ghfgh-#r#ghfgh-#r#qghwddg-#r#qghwvrg#  
r#frp sukhq-,,w/de/hi# 5836<4#

7# Ghflvrq-#dgr#dlg-#r#vro-#r#vssrw-#r#jxgh-#r#p dnh-#r#p dnbj-#r#p dgh,,w/de/hi#  
# 556868#

8# Ghflvrq#p dnbj2# <<6:9#

9# +qirup dwrq-#r#ulw-#dgr#ssulv-,,w/de/hi#47<<#

:# 4#r#5#r#6#r#7#r#8#r#9#748<4#

;/# frqvxp hu#khdok#qirup dwrq2# 73;6#

<# +frqvxp hu-#dgr#khdok#qirup dwrq-,,w/de/hi# ;44#

43# +sdwhqw-#r#frqvxp hu-#r#sxedf-#r#p hglf-#r#khdok-#dgr#hfrp p hggdwrq-#r#jxghdgh-#  
r#jxgdqfh-#r#p hdvuh-#r#dgylfh-#r#qvwxfwrq-,,w/de/hi# 5;:5<3#

44# jxghdghv#dv#rs lf2dgg#sdwhqw-#r#frqvxp hu-#r#sxedf-,,w/de/hi# 45476#

45# ;#r#r#13#r#14# 634875#

46# +frurqdylxv2#r#ehwdfururqdylxv2#r#frurqdylxv#qhfwrqv2#dgg#gjhdvh#rxwehdnv2#r#  
hsbjhp lf2#r#sdqghp lf2# 73397#

47# +qF rY-#r#534<qF rY#r#1<qF rY#r#F R YIG 4<-#r#F R YIG-#r#VDUV OF R Y05#r#VDUV F R Y05#r#  
VDUV F R Y5#r#Vhyuh#Dfxwh#Jhvsldwru| #V|qgurp h#F rurqdylxv5#r#Vhyuh#Dfxwh#Jhvsldwru| #  
V|qgurp h#F rurqd#Ylxv5,,w/de/hi/qp /rwr{/ /{/s{1# 48763:#

48# +qhz-#r#qryh-#r#4<%#r#534<%#r#Z xkdq#r#Kxeh-#r#kld-#r#kqhv-#dgr#frurqdylxv-#  
r#frurqd#Ylxv-#r#ehwdfururqdylxv-#r#F rY#r#K F rY,,w/de/hi/rw# 7:<75#

49# +frurqdylxv-#r#frurqd#Ylxv-#r#ehwdfururqdylxv-#dgr#sdqghp lf-#r#hsbjhp lf-#r#  
rxwehdn-#r#Fulv,,w/de/hi/rw# ;;<3#

4:# +Z xkdq#r#Kxeh-#dgr#sqhxp rqd,,w/de/hi/rw#87#

4;# 46#r#17#r#18#r#19#r#1:# 49364;#

4<# :#dgg#15#dgg#4;#####533

## Cochrane Central Register of Controlled Trials (OVID)

HEP #Jhyhz v#D#F rfkudqh#F hqwdc#Uhj lwhu#i#F rqrwong#Nubov#Mxqh#5354A#

#

4# khdok#Dwhdf|2# 736#

5# khdok#dgr5#dwhdw-#ru#Dwhdf-,,l/de/hz 1# 4;<8#

6# +frqvxp hu-#ru#sxedf#ru#sdwhqw-#dgr5#hydoxdw-#ru#dvvhv-#ru#dssudlv-#ru#xgjh-#ru#xgjbj#  
ru#fkrvvh-#ru#fkrvh-#ru#fkrvbj-#ru#fkrfth-#ghflgh-#ru#ghflbj-#ru#qghuwldqg-#ru#qghuwvrg#  
ru#frp sukhq-,l/de/hz 1# ;:935#

7# Ghflvrlq-#dgr5#dlg-#ru#wro-#ru#xssrw-#ru#xlg-#ru#p dnh-#ru#p dnbj-#ru#p dgh,,l/de/hz 1  
# 4<8<4#

8# Ghflvrlq#P dnbj2# 563:#

9# +qirup dwlrq-#ru#fuwf-#dgr5#dssudlv-,l/de/hz 1# :9<#

:# 4#ru#5#ru#6#ru#7#ru#8#ru#9#3::<<#

;/# frqvxp hu#khdok#qirup dwlrq2# 495#

<# +frqvxp hu-#dgr5#khdok#qirup dwlrq-,l/de/hz 1#;9#

43# +sdwhqw-#ru#frqvxp hu-#ru#sxedf-#ru#p hgIf-#ru#khdok-#dgr7#uhfrp p hqgdwlrq-#ru#xlgdgh-#  
ru#xlgdqfh-#ru#p hdvxh-#ru#dgyIfh-#ru#qvwxfwlrq-,l/de/hz 1# ;4876#

44# jxlgdghv#lv#rsIf2#dgg#sdwhqw-#ru#frqvxp hu-#ru#sxedf-,l/de/hz 1#479#

45# ;#ru#4#ru#13#ru#14# ;4;4;#

46# +frurqdyLxv2#ru#ehwdfururqdyLxv2#ru#frurqdyLxv#qhfwwlrqv2#dgg#g lvhdvh#rxwehdnv2#ru#  
hsLghp lfV2#ru#sdqghp lfV2# 465#

47# qFrY-#ru#534<qFrY#ru#1<qFrY#ru#FRYIG4<-#ru#FRYIG#ru#VDUV0FRY05#ru#VDUVFRY05#ru#  
VDUVFRY5#ru#Vhyuh#Dfxwh#Uhsldwru|#V|qgurp h#F rurqdyLxv#5#ru#Vhyuh#Dfxwh#Uhsldwru|#  
V|qgurp h#F rurqd#Y Lxv#5,l/de/hz 1#9459#

48# +qhz #ru#ryh-#ru#4<%#ru#534<%#ru#Z xkdq#ru#Kxeh#ru#Kld#ru#Klghv#dgr6#frurqdyLxv-#  
ru#frurqd#Y Lxv-#ru#ehwdfururqdyLxv-#ru#FrY#ru#KFrY,,l/de/hz /rw#5;38#

49# +frurqdyLxv-#ru#frurqd#Y Lxv-#ru#ehwdfururqdyLxv-#dgr6#sdqghp lf-#ru#hsLghp lf-#ru#  
rxwehdn-#ru#fuV,,l/de/hz /rw# 537#

4:# +Z xkdq#ru#Kxeh#dgr8#qhxprql,l/de/hz /rw# 78#

4;# 46#ru#17#ru#18#ru#19#ru#1:# 954<#

4<# :#dgg#15#dgg#1;##### 89

## APA Psycinfo

DSD#5v|fIqir#2;39#r#Mxq|Z hhn#5354A#

#

4# Khdok#Dwhdf|2#667;#

5# khdok#dgr5#dhudwh-#ru#dhudf-,,lw 1# 79<7#  
6# +frqvxp hu-#ru#sxedf#ru#sdwhqw-#dgr5#hydoxdw-#ru#dvvhvv-#ru#dssudlv-#ru#xgjh-#ru#xgjbj#  
ru#fkrrvh-#ru#fkrvh-#ru#fkrrvbjj-#ru#fkrfth-#ghflgh-#ru#ghflbj#ru#qghuwddqg-#ru#qghuwvrg#  
ru#frp sukhq-,lw 1# 6:8<8#  
7# Ghflvlrq-#dgr5#dlg-#ru#wro-#ru#vxssrw-#ru#jxlg-#ru#p dnh-#ru#p dnbj-#ru#p dgh,,lw 1  
# 466;;8#  
8# Ghflvlrq#P dnbj2# :;53;#  
9# +qirup dwrq-#ru#fulwf-#dgr5#dssudlv-,,lw 1# 6:34#  
:# fulwfddwklbnlj2#6495#  
;# 4#ru#5#ru#6#ru#7#ru#8#ru#9#ru#:# 4<6835#  
<# Khdok#qirup dwrq2#ru#Khdok#Hgxfdwlrq2# 48<59#  
43# -frqvxp hu-#dgr5#khdok#qirup dwrq-,lw 1# 546#  
44# +sdwhqw-#ru#frqvxp hu-#ru#sxedf-#ru#p hglf-#ru#khdok-#dgr7#uhfrp p hqgdwrq-#ru#jxlgdgh-#  
ru#jxlgdgh-#ru#p hdxh-#ru#dgyfth-#ru#pwxwfwlrq-,lw 1# 8:<8<#  
45# <#ru#13#ru#14# :5<<7#  
46# -frurqdylxv2#ru#ehwdfurqdylxv2#ru#frurqdylxv#qihfwlrqv2,#dgg#g lvhdvh#rxwehdnv2#ru#  
hslghp lfv2#ru#sdqghp lfv2# 4:5<#  
47# -qFrY-#ru#534<qFrY-#ru#1<qFrY-#ru#FRYIG4<-#ru#FRYIG-#ru#VDUV0FRY05-#ru#VDUVFRY05-#ru#  
VDUVFRY5-#ru#Vhyhuh#Dfxwh#Uhsldwru|#V|qgurp h#F rurqdylxv#5-#ru#Vhyhuh#Dfxwh#Uhsldwru|#  
V|qgurp h#F rurqd#Ylxv#5,,lw 1# :549#  
48# +qhz-#ru#qryh-#ru#4<%#ru#534<%#ru#Z xkdq-#ru#Kxehl-#ru#Fklbd-#ru#Fklbhvh-#dgr6#frurqdylxv-#  
ru#frurqd#Ylxv-#ru#ehwdfurqdylxv-#ru#FrY-#ru#KFrY,,lw 1#4856#  
49# +frurqdylxv-#ru#frurqd#Ylxv-#ru#ehwdfurqdylxv-#dgr6#sdqghp lf-#ru#hslghp lf-#ru#  
rxwehdn-#ru#fulv,,lw 1# 99;#  
4:# +Z xkdq-#ru#Kxehl-#dgr8#qhxprql,,lw 1# :#  
4;# 46#ru#17#ru#18#ru#19#ru#1:# :69:#  
4<# ;dgg#15#dgg#1;#####26#

## Embase#

Hp edvh#F olvvlf.Hp edvh#24<7:#x#5354#Mxq|#59A#  
4# khdok#dhudf|2# 46;59#  
5# khdok#dgr5#dhudwh-#ru#dhudf-,,lw/de/hz 1# 4764;#  
6# +frqvxp hu-#ru#sxedf#ru#sdwhqw-#dgr5#hydoxdw-#ru#dvvhvv-#ru#dssudlv-#ru#xgjh-#ru#xgjbj#  
ru#fkrrvh-#ru#fkrvh-#ru#fkrrvbjj-#ru#fkrfth-#ghflgh-#ru#ghflbj#ru#qghuwddqg-#ru#qghuwvrg#  
ru#frp sukhq-,lw/de/hz 1# 6<5:44#

7# Ghflvrlq-#dgr5#dlg-#ru#wro-#ru#xssrw-#ru#xlgh-#ru#p dnh-#ru#p dnlqj-#ru#p dgh,,l/de/nz 1  
# 63;:94#  
8# ghflvrlq#p dnlqj2# 583898#  
9# +qirup dwlrq-#ru#fulf-#dgr5#lssudlv-,l/de/nz 1# 4:;:7#  
:# fulfde#k.lqnlqj2#5845#  
;# 4#ru5#ru6#ru7#ru8#ru9#ru# # ;98546#  
<# frqvxp hu#khdok#qirup dwlrq2# 73:5#  
43# -frqvxp hu-#dgr5#khdok#qirup dwlrq-,l/de/nz 1#<47#  
44# +sdwhqg-#ru#frqvxp hu-#ru#xede-#ru#p hglf-#ru#khdok-#dgr7#uhfrp p hqgdwlrq-#ru#xlghdgh-#  
ru#xlqdqfh-#ru#p hdvxh-#ru#dgylfh-#ru#pwxfwlrq-,l/de/nz 1# 77439: #  
45# <#ru#13#ru#14# 7786;6#  
46# vdw0hohwng#frurqdylxv2# 7:7#  
47# -frurqdylibqdh2#ru#ehwdfururqdylxv2#ru#frurqdylxv#qihfwlrq2,#lqg#hs lghp lf2#ru#sdqghp lf2,  
# 43;39#  
48# -qFrY-#ru#534<qFrY-#ru#<qFrY-#ru#FRYIG4<-#ru#FRYIG-#ru#VDUVOFrY05#ru#VDUVFrY05#ru#  
VDUVOFrY5#ru#VDUVFrY5#ru#Vhyhuh#Dfxwh#Uhs ldrw| #V |qgurp h#F rurqdylxv#5#ru#Vhyhuh#  
Dfxwh#Uhs ldrw| #V |qgurp h#F rurqdylxv#5,l/de/nz /kz /rw# 487686#  
49# +frurqdylxv-#ru#frurqdylxv-#ru#ehwdfururqdylxv-#dgr6#sdqghp lf-#ru#hs lghp lf-#ru#  
rxwehdn-#ru#fulv,,l/de/nz /rw# ;839#  
4: # +Z xkdq#ru#Kxehl,#dgr8#qhxprql,l/de/nz /rw# 6<3#  
4;# 46#ru#17#ru#18#ru#19#ru#1: # 489;73#  
4<# ;#lqg#45#lqg#4;#####551
