# Supplementary material for: Identifying Health Equity Factors That Influence the Public’s Perception of COVID-19 Health Information and Recommendations: A Scoping Review
Source: Int J Environ Res Public Health. 2022 Sep 23;19(19):12073. doi: 10.3390/ijerph191912073 (PMC9565967; doi:10.3390/ijerph191912073)
Supplement: Supplementary file 1 [file ijerph-19-12073-s001.zip › Supplementary S3- Final Proofread.xlsx]

## Sheet: Sheet1
Authors/ Year	Source Country	Study Design	Gender (s) of Participants	Ages of Participants	COVID-19 Information Content	Source of COVID-19 Health Information	Reported PROGRESS- Plus Health Equity Factors	Study Objectives	Outcomes	Key findings	Conclusion
Alanezi et al. 2020	Saudi Arabia	Cross-sectional survey	Male: 65.31% Female: 34.69%	a) 18–24: 9.48% b) 25–34: 59.05% c)35–44: 13.37% d)45–54: 16.07% e) >54: 2.03%	COVID-19-related prevention information and measures (i.e., awareness, management, myths)	a) Ministry of Health; b) Friends and relatives; c) Recognized bodies such as the World Health Organization; d) Research organizations; e) Experts; f) Social media; g) Television; h) Radio; j) Mobiles; k) Newspaper; l) Community centres; m) NGOs; n) Local campaigns	Not reported	This manuscript reviews public awareness about COVID-19, myths surrounding it, its symptoms, treatment, transmission, importance of information sources, types of information to be considered in awareness campaigns, promotional channels, and their implications in Saudi Arabia.	Uptake and awareness of COVID-19 information	The findings from the survey can prove to be a valuable source of information for the government, based on which it can update its awareness creation strategies and also tract peoples’ attitudes toward the pandemic.	Lack of awareness can result in serious outcomes in relation to COVID-19. Effective awareness campaigns including relevant information from reliable sources can improve the knowledge of people, and they must be effective in developing positive attitudes among the public toward adopting preventive measures.
Barry et al. 2020	United States of America	Cross-sectional survey	Male: 42.06% Female: 57.94%	a) <= 40: 40.48% b) 41-64: 43.25% c) 65+: 16.27%	General COVID-19 related health information	a) Social media and social circle of family and friends; b) Internet sites and searches; c) third-party reports (e.g., television, radio and newspaper); d) Scientific sources (e.g., CDC and professional journals)	Education/ Health Literacy, Socioeconomic Status	The primary objective of the current study was to examine whether better knowledge of COVID-19 was associated with patients’ overall health literacy among patients seeking care in an ED. The secondary objective was to demonstrate whether patients’ primary source of COVID-19 information was associated with their COVID-19 knowledge.	Knowledge and uptake of COVID-19 health recommendations	The average COVID-19 knowledge score was 7.09 (range 0-10) and BHLS (Brief Health Literacy Screen) score, 11.09 (range 3-15). About 43% obtained the information primarily from TVs, radios and newspapers, and 1/3 from social media and circles. The group with the primary source being internet searches and sites had the highest average COVID-19 knowledge score of 7.78. The BHLS and COVID-19 knowledg…	To better prevent further increases in COVID-19 transmission, community-based interventions can be more cost-effective when targeting sociodemographic groups that have lower general health literacy. In particular, individuals of low educational and with low income levels should be prioritized.
Basch et al. 2021	United States of America	Successive sampling (longitudinal study)	Not reported	Not reported	COVID-19 vaccination recommendations	a) Social media (e.g., YouTube)	Not reported	The purpose of this study was to improve the understanding about the sources and content of widely viewed YouTube videos on COVID-19 vaccination.	Decision making about COVID-19 vaccination and vaccine uptake	The main implication for public health education is that different messages are more or less relevant to assist different population segments to make informed decisions about vaccination, and the nature of messaging is dynamic and influenced by rapidly changing social context.	Our data show the potentially inaccurate and negative influence social media can have on population-wide vaccine uptake, which should be urgently addressed by agencies of the United States Public Health Service as well as its global counterparts.
Bazaid et al. 2020	Saudi Arabia	Cross-sectional survey	Male: 41.6% Female: 58.4%	a) 18-27: 29.4% b) 28-37: 36.9% c) 38-48: 20.7% d) >47: 13%	COVID-19 preventive health recommendations	Not reported	Place of Residence, Gender, Education, Socioeconomic Status, Age	Investigate knowledge and adherence to the protective measures during the pandemic	Knowledge and adherence to COVID-19 preventive behaviors	Increased awareness and practice were associated with females, high socioeconomic status and high levels of education. Low practice of protective measures was significantly associated with youth (below 37 years old) and residents of the northern part of the Kingdom as well as residents with a lower level of education or income. Tailored education programs and emphasis by public health authorities…	Adherence of public to the advised personal protective measures by the WHO, including hand hygiene and wearing gloves and masks, is crucial to control the COVID-19 pandemic. This study showed that the Saudi population has a relatively high knowledge and implementation of hand hygiene and wearing facial masks and gloves.
Block et al.2020	United States of America	Cross-sectional survey	Male: 45.9% Female: 53.3% Nonbinary: 0.8%	Not reported	COVID-19 public health prevention recommendations	Not reported	Race	We conducted a nationally representative survey of 604 African Americans to generate a risk assessment based on African Americans’ compliance with public health recommendations to frequently wash hands, maintain social distancing, avoid touching face, and wear a mask in public.	Adherence to COVID-19 public health recommendations	African Americans’ level of adherence with COVID-19 public health recommendations suggests they may be at high risk of a resurgence of COVID-19 during reopening, and there is an urgent need for targeted, culturally responsive public health messaging that is accessible to communities of color to help address racial disparities in COVID-19 risk	Given the substantial racial inequality of COVID-19 outcomes, the COVID-19 pandemic is a fitting backdrop to protests for racial equality, and a reminder of a perhaps less-er-known observation of Dr. Martin Luther King, Jr.: “Of all the forms of inequality, injustice in health is the most shock-ing and the most inhuman because it often results in physical death” (King, 1966)
Chen et al. 2020	China	Cross-sectional survey	Male: 50% Female: 50%	16 to 71 years	General COVID-19 health information and preventive recommendations	a) Newspapers/magazines; b) TV; c) Radio; d) Cellphone text messages; e) Web portals; f) Social media; g) News websites; h) Video-sharing social networking service; j) Online question and answer platforms; k) Search engines; l) Online learning platform	Place of Residence, Education, Socioeconomic Status, Age	The purpose of this study is to examine the differences in preventive behaviors of COVID-19 between urban and rural residents, as well as identify the factors that might contribute to such differences.	Engagement in preventive behaviors, behavioral intention, attitude, subjective norms, knowledge, interpersonal sources of information, media sources of information, information appraisal	To curb the pandemic, it is important to increase people’s positive attitude toward preventive behaviors (e.g., social distancing, hand washing, and facemask wearing) and raise their normative beliefs that the preventive measure is a must-do to protect other community members	Tailoring health messages to meet rural populations’ unique needs can be an effective strategy to promote preventive health behaviors against COVID-19.
Czeisler et al. 2020	United States of America	Cohort survey	United States Male:43.9% Female: 56.1% New York Male: 44.8% Female: 55.2% Los Angeles Male: 47.1% Female: 52.9%	United States a) 18-24: 3.9% b) 25-34: 8.5% c) 35-44: 15% d) 45-54: 19% e) 55-64: 23.4% f) >-65: 30.2% New York a) 18-24: 4.2% b) 25-34: 11.5% c) 35-44: 14% d) 45-54: 13.6% e) 55-64: 26.9% f)>-65: 29.7% Los Angeles a) 18-24: 5.8% b) 25-34:10.4% c) 35-44: 12.4% d) 45-54: 18.5% e) 55-64: 22% f) >-65: 30.9%	COVID-19 prevention guidelines (stay at home orders, masks, physical distancing, group gathering, inside dining, self isolation).	Not reported	Place of Residence, Occupation, Age	To assess and understand public attitudes, behaviors, and beliefs related to this guidance and COVID-19, representative panel surveys were conducted among adults aged ≥18 years in New York City (NYC) and Los Angeles, and broadly across the United States during May 5–12, 2020. Surveys were conducted among residents of NYC and Los Angeles to enable comparison of the two most populous cities in the …	Attitude, behaviors, and beliefs related to COVID-19 preventive health guidelines	Most adults reported they would not feel safe if government-ordered community mitigation strategies such as stay-at-home orders and nonessential business closures were lifted nationwide at the time the survey was conducted, although a minority of these adults who did not feel safe wanted these restrictions lifted despite the risks.	Widespread support for community mitigation strategies and commitment to COVID-19 public health recommendations indicate that protecting health and controlling disease are public priorities amid this pandemic, despite daily-life disruption and adverse economic impacts.
Desalegn et al. 2021	Addis Ababa, Ethiopia	Cross-sectional survey	Male: 58.0% Female: 41.1%	a) 20–29: 50.8% b) 30–39: 27.8% c) 40–49: 9.8% d) 50–59: 2.7% e) >=60: 1.2%	COVID-19 prevention guideline	a) Government-owned television; b) Government-owned radio; c) Social media; d) Privately-owned television	Occupation	This study aimed to assess the public KAP and service providers’ preparedness towards the pandemic in Addis Ababa, Ethiopia.	Knowledge, attitude, practice, and engagement in recommended prevention behaviors	In general, data from the current study showed most probably a positive public health education effect leading to desired preventive measures as recommended by the government in the cit	The public in Addis Ababa had moderate knowledge, an optimistic attitude and descent practice. The information flow from government and social media seemed successful seeing the majority of the respondents identifying preventive measures, signs and symptoms and transmission route of SARS-CoV-2. Knowledge and attitude was not associated with practice, thus, additional innovative strategies for pra…
Enria et al. 2021	United Kingdom	Cross-sectional survey	Male: 21.0% Female 78.5% All other genders: 0.5%	a) 20–34: 6.6% b) 35–54: 35.5% c) 55–69: 46.1% d) >70: 11.8%	COVID-19 prevention health information	a) United Kingdom government reports	Place of Residence, Race, Gender, Education, Socioeconomic Status, Age	We investigated public perceptions of the UK government’s COVID-19 response, focusing on the relationship between trust and perceived transparency, during the first wave (April 2020) of the COVID-19 pandemic in the United Kingdom.	Uptake and acceptance of COVID-19 preventive measures by the government	Our participants’ assessments lead us to reflect on our key finding that there are significant differences in levels of trust across geographical, income and educational backgrounds	Our study suggests that trust is not homogenous across communities, and that generalised mistrust, concerns about the transparent use and communication of evidence and insights into decision-making processes can affect perceptions of the government’s pandemic response. We recommend targeted community engagement, tailored to the experiences of different groups and a new focus on accountability and…
Hermans et al. 2021	Belgium	Cross-sectional survey	Male: 49.05% Female: 50.95%	a)18–24: 13.75% c)25–34: 15.7% c)35–44: 15.73% d)45–54: 16.64% e)55–64: 16.02% f)65+: 22.16%	COVID-19 preventive recommendations	Not reported	Education/ Health Literacy	In this study, the association of health literacy with mental health, compliance with COVID-19 preventive measures and health prospects was assessed in a Belgian context.	Compliance with COVID-19 preventive measures	People with sufficient health literacy: -less likely to suffer from anxiety disorders, depression, sleep disorders -more likley to have optimal vitality and adhere to COVID-19 measures except for covering nose and mouth when social distancing cannot be respected -less likley to percieve returing to norma; life as threatening, and to consider themselves at risk for infection	These results suggest that health literacy is a crucial factor in managing the COVID-19 epidemic and offer a perspective for future studies that target health literacy in the context of virus outbreaks
Kerr et al. 2021	United Kingdom	Experimental surveys (Trials)	Study 1 Male: 48.3% Female: 51.7% Study 2 Male: 47% Female: 53%	aged 18 years or older	COVID-19 vaccine information	a) US Food and Drug Administration; b) European Medicines Agency; c) Centres for Disease Control and Protection; d) British Society for Immunology; b) Pfizer	Not reported	study 1: does information specifically targeted to beliefs about vaccine efficacy, or concerns about safety shift these beliefs, and, if so, do these changes in turn have an impact on COVID-19 vaccination intentions? Study 2: does highlighting the need to maintain protective behaviours (e.g., social distancing) post-vaccination may lower perceptions of vaccine efficacy and willingness to receive …	Uptake of COVID-19 vaccine and information	Study 1: detailed information about COVID-19 vaccines, including results of clinical trials, does not have a significant impact on beliefs about the efficacy of such vaccines, concerns over side effects, or intentions to receive a vaccine. Study 2:transparent messages did not significantly reduce perceptions of vaccine efficacy, and in some cases increased perceptions of efficacy.	The results of both studies suggest that transparently informing people of the limitations of vaccina- tions does not reduce intentions to be vaccinated but neither does it increase intentions to engage in protective behaviours post-vaccination.
Kor et al. 2021	China Hong Kong Macau	Cross-sectional survey	Male: 77.8% Female: 22.0%	a)<39: 74.9% b)40-59: 19.8% c)≥60: 5.3%	General COVID-19 related prevention information	a) Search engines; b) Websites of public bodies; c) Wikipedia and other online encyclopedias; d) Social media; e) YouTube; f) Blogs on health topics; g) Online communities; h) Health portals	Gender, Education, Socioeconomic Status, Age, Disability	This study aimed to (a) understand the satisfaction level of the online information related to COVID-19 in people with and without chronic dis- eases; (b) explore information-searching behavior and digital health literacy in PWCD; and (3) identify the possible predictors of information satisfaction among PWCD.	Satisfaction and uptake of information or misinformation	From a clinical viewpoint, the findings generated insights on the importance of digital health literacy for supporting the public, particularly PWCD, during a pandemic	The majority of PWCD sought online information related to COVID-19 from social media, and their level of information satisfaction was significantly lower than among people without chronic diseases. Digital health literacy is a strong and significant predictor of information satisfaction.
Lennon et al. 2020	United States of America	Cross-sectional survey	Male : 23.8% Female: 74.33% Nonbinary: 0.86% Prefer not to answer: 0.78% Missing information: 0.24%	Respondents were primarily middle age (48 years)	COVID-19 public health recommendations	Not reported	Place of Residence, Race	We are conducting a global, convergent design mixed-methods survey on public knowledge, perceptions, preferred health information sources, and understanding of and intent to comply with public health recommendations.	Knowledge, perceptions, preferred health information sources, and understanding of and intent to comply with public health recommendations	National average intent to comply most certainly was over 80% for four recommendations: wash hands (90%); social distancing (86%); stay home (95%); and cough etiquette (86%), but substantially lower for avoid touching face (59%, N = 5,005, p < .05)	In summary, this study suggests that there are substan- tial, significant regional differences in intent to comply with public health recommendations to reduce the spread of COVID-19, which is alarming as states begin to reopen. Lo- cal- and state-level resurgence rates will determine the extent to which public intent-to-comply with public health recom- mendations correlates with resurgence risk …
Li, Shaojie et al. 2021	China	Cross-sectional survey	Male: 51.7% Female: 48.3%	Ranging from 18 to 25 years	COVID-19 prevention recommendations	a) Guidelines for Public Protection Against Pneumonia Caused by the Novel Coronavirus Infection, which were compiled by the Chinese Center for Disease Control and Prevention (China CDC); b) Internet; c) Media; d) Social media	Place of Residence, Gender, Education/ Health Literacy, Socioeconomic status	The objective of this study was to develop and verify a COVID-19–related health behavior questionnaire, explore its status and structure, and examine the associations between these behaviors and participants’ health literacy and eHealth literacy.	Adoption of COVID-19 related preventive behaviors	The study results showed that health and eHealth literacy were positively related to COVID-19–related health behaviors among college students.	The COVID-19–related health behavior questionnaire was a valid and reliable measure for assessing health behaviors during the pandemic. College students with higher health literacy and eHealth literacy can more actively adopt COVID-19–related health behaviors. Additionally, compared to health literacy, eHealth literacy is more closely related to COVID-19–related health behaviors. Public intervent…
Li, Yingkai et al. 2020	United States of America	prospective observational cohort study	Male: 55% Female: 45%	Age (y) 65.5 (58-75)	COVID-19 prevention information and recommendations	a) Federal government, state governments; b)local healthcare providers; c)television news, and presidential news; d) conferences and addresses; e)websites, social media; f) religious organizations	Religion, Education, Socioeconomic Status, Age	To understand how patients with MG are experiencing the current coronavirus disease 2019 (COVID-19) pandemic, where they are getting their information, how it has affected their medical care, and the measures they are taking to protect themselves.	Knowledge and perceptions of COVID-19 information and recommendations	Our survey results demonstrate a high level of concern and anxiety about the pandemic Our data suggest that healthcare providers, the government, and patient organizations play a critical role in this pandemic and future public health crises affecting the MG patient community. Use of targeted communication strategies by these groups may lead to better informed patients with reduced patient anxiet…	Healthcare providers, the government, and patient organizations play a critical role in communicating with the MG patient community. Use of targeted messaging strategies by these groups to convey accurate information may increase effectiveness and lead to more informed patients with reduced anxiety.
McCaffery et al. 2020	Australia	Cross-sectional survey	Male: 39% Female: 60% Prefer not to say: 1%	a)18-25: 22% b)26-40: 28% c)41-55: 22% d)56-90: 28%	COVID-19 prevention and vaccine information	a) Public television; b) Social media; c) Government websites	Race, Gender, Education/ Health Literacy, Age	To explore the level of understanding of, attitudes towards, and uptake of, helath advice on COVID-19	Knowledge, attitudes, beliefs, behaviors, and uptake of COVID-19 information	People with inadequate health literacy: - poorer understanding of COVID-19 symptoms -less able to identify behaviours to prevent infection -had more difficulty finidng information and understanding government messaging about COVID-19 -less likley to rate social distancing as important -more difficulty with remebering and accessing medicines since lockdown -more likley to endorse misinformed belie…	There are important disparities in COVID-19 related knowledge, attitudes and behaviours that relate to peoples health literacy and language.
Montagni et al. 2021	France	Prospective cohort survey	Anti-vaccination Male: 14.7% Female: 85.3% Hesitant Male: 17.2 Female: 82.8% Pro-vaccination Male: 23.9% Female: 76.1%	Anti-vaccination a)18–34: 88.6% b)35 or more: 11.4% Hesitant a)18–34: 82.8% b)35 or more: 17.2% Pro-vaccination a)18–34: 83.8% b)35 or more: 16.2%	COVID-19 Vaccine information and recommendations	a) Media b) Social media	Gender, Education/ Health Literacy	This study aimed to investigate the relations between intention to get vaccinated against the SARS-CoV-2 and the ability to detect fake news about Covid-19 as well as health literacy among a population-based sample of French adults.	Uptake of information or misinformation (i.e., detection of fake news)	We observed significant associations between intention to get vaccinated against the SARS-CoV-2 and sex (p < 0.01), study- ing or working in the health domain (p < 0.01), having their vaccination up-to-date (p < 0.01), being regularly vaccinated against flu (p < 0.01) and the two exposure variables detection of fake news (p < 0.01) and HL (p < 0.01).	To promote acceptance of a vaccine against SARS-CoV-2, it is recommended to increase individuals’ ability to detect fake news and health literacy through education and communication programs.
Motta Zanin et al. 2020	Italy and abroad	Case Study	Italy Male: 40.20% Female: 59.80% Abroad Male: 38.10% Female: 61.90%	Italy a)<25: 16% c)26-35: 30.3% c)36-50: 29% d)51-65: 19.3% e)>65: 5.5% Abroad a)<25: 17.9% b)26-35: 49.7% c)36-50: 22.5% d)51-65: 7.7% e)>65: 2.3%	General COVID-19 related prevention information and COVID-19 recommendations	a) Television; b) Social networks; c) Newspapers; d) Internet; e) Scientific journals; f) Radio; g) Relatives and friends; h) General practitioner; j) Other	Not reported	this study aims at investigating Italian public perceptions of health risk.	Perception of mitigation measures	The obtained results highlight a significative influence that mass media play on both the level of knowledge and the feelings of the respondents. The findings also point out future variations of some perceived behaviors consequent to the COVID-19 outbreak.	This study confirms the key role of mass media on the risk perception, level of knowledge regarding the emergency situation, the level of acceptance of mitigation measures, and the perceived feelings by the Italian population. Consequently, the discussion of fake news and misleading information may result in an incorrect perception of risk. For this reason, governments should implement measures t…
Ng et al. 2021	United States of America	Cross-sectional survey	Male: 45.2% Female: 54.8%	a)65–74: 64.1% b)≥75: 35.9%	COVID-19 prevention information and recommendations	a) Traditional news sources, including television, radio, websites, and newspapers; b) Social media; c) Comments or guidance from government officials; d) Other webpages/ Internet; e) Friends or family members; f) Health care providers	Place of Residence, Race, Gender, Socioeconomic Status, Social Capital, Age	The public relies on various media sources and communication platforms for receipt of coronavirus disease 2019 (COVID-19) information. Therefore, identifying the primary sources of COVID-19 information among older adults can be valuable, as it can enable information on life-saving measures to be effectively disseminated to this population.	Engagement in recommended prevention behaviors	Our findings can inform decision making about the effective communication sources to reach Medicare beneficiaries for public health messaging regarding preventive measures, including COVID-19 vaccination.	Identifying the primary sources of COVID-19 information that Medicare beneficiaries rely on can inform decision making for public health promotional outreach efforts, such as ongoing COVID-19 messaging on mitigation strategies and vaccination
Okan et al. 2020	Germany	Cross-sectional survey	Male: 51.3% Female: 48.7%	a)16–29: 21.8% b)30–44: 25.7% c)45–59: 30.8% d)60+: 21.7%	General COVID-19 prevention information	a) Internet; b) Newspapers; c) Magazine; d) Television	Place of Residence, Gender, Education, Socioeconomic Status, Age	The aim of this study was to (1) test the feasibility of a newly developed assessment tool for coronavirus-related health literacy, (2) assess coronavirus-related health literacy of German adults, (3) examine differences in health literacy in relation to sociodemographic variables, and (4) explore how participants feel with regard to the overabundance of health information during the COVID-19 inf…	COVID-19 health recommendations access, understanding, appraisal, and applying	Although the overall level of health literacy is high, a vast number of participants report difficulties dealing with coronavirus and COVID-19 information. The participants felt well informed about coronavirus, but 47.8% reported having difficulties judging whether they could trust media information on COVID-19	Confusion about coronavirus information was significantly higher among those who had lower health literacy. This calls for targeted public information campaigns and promotion of population-based health literacy for better navigation of information environments during the infodemic, identification of disinformation, and decision-making based on reliable and trustworthy information.
Patil et al. 2021	United States of America	Cross-sectional survey	Male: 55% Female: 42% Other: 3%	On average, respondents were 23.9 ± 4.3 years old	General COVID-19-related information	a) Internet; b) Social media	Race, Gender, Education/ Health Literacy, Disability	This study explored whether COVID-19-related information access, attitudes, and behaviors were associated with health literacy and digital health literacy among college students in the United States.	COVID-19-related information access, attitudes, and behaviors	The study findings can inform future student-focused interventions, including identifying the distinct roles of HL and DHL in pandemic information access, attitudes, and behaviors.	Given that students with adequate HL are more resilient to health misinformation and associated health conspiracy theories, increasing students’ HL and DHL will help combat negative health outcomes and the toxic effects of the current infodemic. The knowledge, attitudes, and behaviors of college students during the COVID-19 pandemic are of high interest because they seem to be factors that are in…
Pickles et al.2021	Australia	Prospective longitudinal cohort study	a)April-Round 1 Male: 39.9% Female: 60% Not specified/other: 1.1% b)April-Round 1 Male: 31.7% Female: 66.7% Not specified/other: 1.6% c)May-Round 2 Male: 31.3% Female: 67.1% Not specified/other: 1.6% d)June-Round 3 Male: 31.6% Female: 66.5% Not specified/other: 1.8%	Adults (18 years and above)	COVID-19 prevention information and recommendations	a) Family and friends; b) Television; c) Radio; d) Print media; e) Health (and allied) care providers	Race, Gender, Education, Age	This study aimed to investigate the prevalence and factors associated with COVID-19 misinformation in Australia and their changes over time	Perception and uptake of information or misinformation	Stronger agreement with misinformation was associated with younger age, male gender, lower education level, and language other than English spoken at home (P<.01 for all). After controlling for these variables, misinformation beliefs were significantly associated (P<.001) with lower levels of digital health literacy, perceived threat of COVID-19, confidence in government, and trust in scientific …	The findings of this study highlight important gaps in communication effectiveness, which must be addressed to ensure effective COVID-19 prevention
Riiser et al. 2020	Norway	Cross-sectional survey	Girls: 82.5% Boys: 17.2% Not answered: 0.3%	a)16 yrs: 31.4% b)17 yrs: 24.8% c)18 yrs: 24.3% d)19 yrs: 19.5% e)Not answered: 0.3%	General COVID-19 prevention information and protective measures	a) TV; b) Radio; c) Newspapers; d) Podcasts; e) YouTube, Snapchat, TikTok, Instagram, Facebook, other media; f ) Family and friends; g) School	Place of Residence, Gender, Education/ Health Literacy	First, to describe adolescents’ health information sources and knowledge, health literacy (HL), health protective measures, and health-related quality of life (HRQoL) during the initial phase of the Covid-19 pandemic in Norway. Second, to investigate the association between HL and the knowledge and behavior relevant for preventing spread of the virus. Third, to explore variables associated with H…	Knowledge, behavior, and uptake of COVID-19 health information	Television (TV) and family were indicated to be the main sources for pandemic-related health information. Handwashing, physical distancing, and limiting the number of social con- tacts were the most frequently reported measures. HL and handwashing knowledge and HL and handwashing behavior were significantly associated. For each unit increase on the HL scale, the participants were 5% more likely t…	Adolescents follow the health authorities’ guidelines and appear highly literate. However, high fidelity requires great sacrifice because the required measures seem to collide with cer- tain aspects that are important for the adolescents’ HRQoL.
Rose et al. 2021	United States of America	Cross-sectional survey	Male: 36.5% Female: 63.5%	Not reported	COVID-19 health recommendations	Not Reported	Race, Gender, Education, Socioeconomic Status, Age	The current research examined people’s beliefs about how their own compliance to recommendations compared to others and explored the unique associations between social comparisons, worry, risk perceptions, and intentions for health-protective action.	Compliance with COVID-19 preventive measures	-participants reported better-than-average compliance beliefs -comparative beliefs were positively associated with intentions for future compliance-related behaviors and general risk-reduction behaviors - relation between comparative beliefs and intentions was indirect through worry (but not risk)	Results demonstrate that people are attentive to their comparative levels of compliance behaviors during an infectious disease pandemic.
Schafer et al. 2021	Germany	Cross-sectional survey	a)Study 1 Male: 28.6% Female: 70.5% Diverse: 0.9% b)Study 2 Male: 26.8% Female: 72.6% Diverse: 0.7% c)Subsample 1/2 Male: 22.6% Female: 77.0% Diverse: 0.5%	Not reported	General COVID-19 related health information	a) Medical online consultation (e.g., online consultation of doctors or hospitals); b) Online radio, audio streaming and/or podcast; c) Online television and/or video streaming (e.g Netflix, Amazon Prime); d) Online pharmacies comparison portals for searching doctors, hospitals, and nursing homes e)Websites of (non-profit) health organizations, independent patient or self-help organizations; f) S…	Gender, health literacy, Age	We investigate which information channels students use for health information, how information seeking changes during the course of the pandemic, and to what extent information seeking is associated with risk perception and risk behavior.	Seek COVID-19 health recommendations, perception, and behavior	Study 1: The students in our sample were quite active with regard to their health information-seeking behavior. Of the students, 80% stated that they sought information on health and disease at least once a month, 41% stated that they engaged in health information seeking every week, and 11% every day. Only 1% of the students indicated that they did not seek health information during that respect…	The results show that students’ health information seeking takes place primarily online and changed markedly during the corona crisis. The comparatively high relevance of sources that are largely based on unchecked user-generated content raises the concern whether students’ health information-seeking behavior guarantees the necessary quality and reliability of health information. Significant corr…
Schultz et al. 2021	France	Cross-sectional survey (short Communication)	Not reported	Not reported	General scientific advice and COVID-19 public health policies	Not Reported	Not reported	Both the political appetite for a science-based coronavirus disease 2019 (COVID-19) policy and its acceptability to the public are little understood, at a time of sharp distrust not only of govern- ments but also of scientists and their journals' review practices. We studied the case of France, where the independent Scientific Council on COVID-19 was appointed by President Macron on March 12, 202…	Perception of COVID-19 public health policies	Intense media coverage has given the council a very high public profile, with three respondents out of four (73%) having heard about it. Perceptions are positive but complex. French citizens expect science to be important in political decision-making. Four of five (81.5%) want political decisions, in general, to be based on scientific knowledge. But one in two (55%) says that the government has n…	Our study confirms that while the transparency of scientific advice is important, it alone cannot ensure public confidence in political decision-making. We suggest that efforts made today to instill a ‘science-savvy’ public culturedone that allows the complex articulation between scientific knowledge, uncertainty, and political decision-making to be understood and accounted for would greatly bene…
Syropoulos et al. 2021	United States of America	Cross-sectional Study	a)Timepoint 1 Male: 54.3% Female: 45.67% b)Timepoint 2 Male: 45.19% Female: 54.81%	Not reported	General COVID-19 prevention information and guidelines	Not Reported	Not reported	Examine how individual differences in core moral motivators of collective action (i.e., fairness and gratitude) relate to individuals’ COVID-19 responses.	Adhering to health guidelines	Individual differences in fairness and gratitude were associated with more adaptive (i.e. positive emotions) and prosocial (i.e. remaining familiar with the pandemic, adhering to public health guidelines, prioritizing saving lives) responses to the pandemic.	Understanding the links between gratitude, fairness and legacy motives, and their impact on prosociality, could promote both current and intergenerational prosocial decision making.
Tang et al. 2021	China	Semi-structured interviews (Case Study)	People aging from 24-56	Male: 41.18% Female: 58.82%	COVID-19 prevention information, personal opinions, and outbreak informations	a) Governmental organizations and state media; b) Social media, personal accounts and group chats, media, TV; c) Online news subscription services, news websites and online newspapers and search engines	Education, Age	The current study examined how people in Hubei Province, the epicenter of the COVID-19 outbreak in China, acquired and shared information while under lockdown during the first two months of 2020	Information seeking, scanning, and sharing (Health Information Consumption)	This study has several practical implications. First, information scanning relying on trusted sources is the primary channel of individuals’ information consumption during the COVID-19 outbreak in China. This suggests that governmental agencies (e.g., office of emergency management and local health agencies) should establish a strict standard for checking information quality. Second, our study re…	Results showed insights into how individuals in China use different media for information during an unprecedented public health crisis and make sense of the limited and often confusing and contradictory information that is available to them. Such findings can inform future health communication efforts during EID outbreaks.
VanScoy et al. 2021	United States of America	Cross-sectional survey	Male: 31.66% Female: 67.35% Non-binary: 0.18% Prefer not to answer: 0.52% Missing: 0.29%	No age range reported	General COVID-19 related prevention information and behavioral recommendations	a) Government websites (e.g., Centres for Disease Control and Prevention, National Institutes of Health [NIH], and the World Health Organization [WHO]) ; b) Television news	Race, Gender, Education, Age	To explore public knowledge, understanding of public health recommendations, perceptions, and trust in information sources related to COVID-19	Adherence, knowledge, understanding of public health recommendations, perceptions, and trust in information sources related to COVID-19	Knowledge was significantly higher in patients with higher education and nonminority race. While the majority of respondents reported that they believed following CDC recommendations would decrease the spread of COVID-19 in their community and intended to adhere to them, only 65.2% rated social isolation with the highest level of belief and adherence. The most trusted information source was feder…	Knowledge about COVID-19 and intended adherence to behavioral recommendations were high. There was substantial distrust of the executive branch of the federal government, however, and concern about mixed messaging and information overload. These findings highlight the importance of consistent messaging from trusted sources that reaches diverse groups.
Vardavas et al. 2021	G7 Countries (Canada, France, Great Britain, Germany, Italy, Japan, and the United States)	Cross-sectional survey	Male : 50.16% Female: 48.75% Other/Prefer not to say: 1.08%	a)16-24: 11.56% b)25-44: 37% c)45-64: 36.89% d)>65: 14.55%	Governmental communication regarding prevention guidelines and the COVID-19 outbreak	a) Doctors/ health care providers; b) Friends/ family; c) Government/ politicians; d) Mass media (e.g., newspapers/ news websites/ television); e) Social Media (e.g., Facebook, Twitter)	Place of Residence	Assess public attitudes towards governmental actions to combat the COVID-19 pandemic in the G7 countries.	Engagement in the COVID-19 preventive behaviors	Our analysis also revealed that understanding of precautionary measures and trusted sources of information strongly predicted public attitudes towards governmental actions, highlighting the importance of health communications that educate the public on the purposes and expected effects of precautionary measures and how to practice these measures through various communication channels.	Public attitudes towards governmental actions against COVID-19 varied substantially across the G7 countries. Amongst the G7, Japan had the lowest level of approval of governmental response to the pandemic, rating governmental communication as good, and trusting governmental decisions, followed by the U.S. Those who reported government/politicians and friends/family as their most trusted informati…
Wong et al. 2020	Hong Kong	Cross-sectional survey	Male: 47.4@ Female: 52.6%	e) 18-59: 72.2% f) 60 or above: 27.8%	General COVID-19 health information	a) Family members; b) Social media	Gender, Education/ Health Literacy, Socioeconomic Status, Age	We tested a model of individual health literacy information sharing with family members, personal preventive behaviours and family well-being during the Coronavirus Disease 2019 (COVID-19) pandemic in Hong Kong.	Engagement in the preventive behaviors and COVID-19 information sharing	COVID-19 information sharing with family members partially mediated individual health literacy and personal preventive behaviours after adjusting for sex, age, and socioeconomic status and adding family well-being as the outcome of the model.	COVID-19 information sharing with family members was a partial mediator between individual health literacy and personal preventive behaviours against COVID-19. The findings can contribute to devising strategies for promoting preventive measures against the COVID-19 pandemic and sustainable measures in public empowerment towards epidemic emergency
